# Supplementary material for: Poly(3-hydroxybutyrate) Production from Lignocellulosic Wastes Using Bacillus megaterium ATCC 14581
Source: MDPI journal article supplement (doi:10.3390/polym15234488), 2023-11-22
Supplement: s1 [file s1]

## Supplementary Material

# Poly(3-hydroxybutyrate) production from lignocellulosic wastes using *Bacillus megaterium* ATCC 14581

Lacrimioara Senila <sup>1,\*</sup>, Emese Gál <sup>2</sup>, Eniko Kovacs <sup>1,3</sup>, Oana Cadar<sup>1</sup>, Monica Dan<sup>4</sup>, Marin Senila<sup>1</sup>, Cecilia Roman<sup>1</sup>

**Table S1.** Analysis of variance for cellulose

| Source                        | DF | Adj SS  | Adj MS  | F-Value | P-Value |
|-------------------------------|----|---------|---------|---------|---------|
| Model                         | 5  | 290.641 | 58.128  | 3.57    | 0.001   |
| Linear                        | 2  | 84.125  | 42.063  | 2.58    | 0.099   |
| X <sub>1</sub>                | 1  | 15.680  | 15.680  | 0.96    | 0.338   |
| X <sub>2</sub>                | 1  | 68.445  | 68.445  | 4.20    | 0.053   |
| Square                        | 2  | 206.508 | 103.254 | 6.34    | 0.007   |
| X <sub>1</sub> X <sub>1</sub> | 1  | 206.507 | 206.507 | 12.68   | 0.002   |
| X <sub>2</sub> X <sub>2</sub> | 1  | 0.002   | 0.002   | 0.00    | 0.992   |
| 2-Way Interaction             | 1  | 0.008   | 0.008   | 0.00    | 0.983   |
| X <sub>1</sub> X <sub>2</sub> | 1  | 0.008   | 0.008   | 0.00    | 0.983   |
| Error                         | 21 | 342.054 | 16.288  |         |         |
| Lack-of-Fit                   | 3  | 52.566  | 17.522  | 1.09    | 0.379   |
| Pure Error                    | 18 | 289.489 | 16.083  |         |         |
| Total                         | 26 | 632.695 |         |         |         |

**Table S2.** Analysis of variance for hemicelluloses

| Source                        | DF | Adj SS  | Adj MS  | F-Value | P-Value |
|-------------------------------|----|---------|---------|---------|---------|
| Model                         | 5  | 1176.92 | 235.385 | 69.42   | <0.0001 |
| Linear                        | 2  | 1150.51 | 575.254 | 169.66  | <0.0001 |
| X <sub>1</sub>                | 1  | 990.42  | 990.422 | 292.11  | <0.0001 |
| X <sub>2</sub>                | 1  | 160.09  | 160.086 | 47.21   | <0.0001 |
| Square                        | 2  | 17.78   | 8.890   | 2.62    | 0.096   |
| X <sub>1</sub> X <sub>1</sub> | 1  | 14.39   | 14.394  | 4.25    | 0.052   |
| X <sub>2</sub> X <sub>2</sub> | 1  | 3.39    | 3.385   | 1.00    | 0.329   |
| 2-Way Interaction             | 1  | 8.64    | 8.636   | 2.55    | 0.125   |
| X <sub>1</sub> X <sub>2</sub> | 1  | 8.64    | 8.636   | 2.55    | 0.125   |
| Error                         | 21 | 71.20   | 3.391   |         |         |
| Lack-of-Fit                   | 3  | 42.66   | 14.221  | 8.97    | 0.001   |

|            |    |         |       |
|------------|----|---------|-------|
| Pure Error | 18 | 28.54   | 1.586 |
| Total      | 26 | 1248.13 |       |

**Table S3.** Analysis of variance for lignin

| Source                        | DF | Adj SS  | Adj MS  | F-Value | P-Value |
|-------------------------------|----|---------|---------|---------|---------|
| Model                         | 5  | 342.548 | 68.510  | 38.40   | 0.000   |
| Linear                        | 2  | 161.575 | 80.788  | 45.29   | 0.000   |
| X <sub>1</sub>                | 1  | 159.907 | 159.907 | 89.64   | 0.000   |
| X <sub>2</sub>                | 1  | 1.668   | 1.668   | 0.94    | 0.345   |
| Square                        | 2  | 138.032 | 69.016  | 38.69   | 0.000   |
| X <sub>1</sub> X <sub>1</sub> | 1  | 128.591 | 128.591 | 72.08   | 0.000   |
| X <sub>2</sub> X <sub>2</sub> | 1  | 9.442   | 9.442   | 5.29    | 0.032   |
| 2-Way<br>Interaction          | 1  | 42.941  | 42.941  | 24.07   | 0.000   |
| X <sub>1</sub> X <sub>2</sub> | 1  | 42.941  | 42.941  | 24.07   | 0.000   |
| Error                         | 21 | 37.463  | 1.784   |         |         |
| Lack-of-Fit                   | 3  | 18.581  | 6.194   | 5.90    | 0.005   |
| Pure Error                    | 18 | 18.882  | 1.049   |         |         |
| Total                         | 26 | 380.011 |         |         |         |
